# Supplementary material for: Identification of Candidate Genes related to Bovine Marbling using Protein-Protein Interaction Networks
Source: PubMed Central journal article supplement — Int J Biol Sci. 2011 Aug 13;7(7):992–1002. doi: 10.7150/ijbs.7.992 (PMC3164149; doi:10.7150/ijbs.7.992), 2011-08-13
Supplement: ijbsv07p0992s1.pdf [file ijbsv07p0992s1.pdf]

Supplementary Data 1. The evidence of relationship between the gene and biological function related to the marbling trait from the literature.

| Name    | Sentence                                                                                    | PMID           | Journal                                       | Year | Volume | Page (start) | Page (end) |
|---------|---------------------------------------------------------------------------------------------|----------------|-----------------------------------------------|------|--------|--------------|------------|
| ACACA   | Fatty acid metabolism was altered with decreased amounts of fat                             | PMID: 17521938 | Mol Genet Metab.                              | 2007 | 91     | 209          | 217        |
| ACLY    | ATP citrate lyase (ACLY) is the primary enzyme responsible for the                          | PMID: 14688200 | FASEB J.                                      | 2004 | 18     | 415          | 417        |
| ACTA1   | Twelve genes, including SLC25A6, EEF1G, EEF1A1, COX1, ACTA1, S                              | PMID: 19937143 | Mol Cells.                                    | 2009 | 28     | 529          | 536        |
| ADFP    | In this study, we investigated the association between genetic poly                         | PMID:19712591  | BMB Rep                                       | 2009 | 42     | 529          | 534        |
| ADIPOQ  | We confirmed the presence of QTL affecting marbling, ribeye mus                             | PMID:17121600  | Anim Genet.                                   | 2006 | 37     | 554          | 562        |
| ADRB1   | Activation of the $\beta$ 1-adrenergic receptor (ADRB1) causes increaser                    | PMID: 17335470 | Diabet Med.                                   | 2007 | 24     | 392          | 397        |
| ADRB2   | The beta-2 adrenergic receptor is a major lipolytic receptor in hun                         | PMID: 15672110 | Int J Obes (Lond).                            | 2005 | 29     | 449          | 457        |
| ADRB3   | A salient feature of chronic Adrb3 activation is pronounced remoc                           | PMID: 15941787 | Am J Physiol Endocrinol Metab.                | 2005 | 289    | 608          | 616        |
| AGPAT1  | AGPAT2 expression was at least 2-fold higher than AGPAT1 in the                             | PMID: 12107193 | J Clin Endocrinol Metab.                      | 2002 | 87     | 3019         | 3022       |
| AKIRIN2 | Thus, the akirin 2 (AKIRIN2) gene containing the c17-25 EST seque                           | PMID:19594944  | BMC Res Notes.                                | 2009 | 2      | 131          |            |
| ALB     | In trans-activation assays, celecoxib acted as a PPAR $\gamma$ agonist whe                  | PMID: 15629510 | J Hepatol.                                    | 2005 | 42     | 75           | 81         |
| ATP2A2  | The increase in muscle sarcoendoplasmic Ca2+-ATPase (SERCA2a)                               | PMID: 16914547 | J Biol Chem.                                  | 2006 | 281    | 31894        | 31908      |
| CAMK2A  | Calcium/calmodulin-dependent protein kinase II alpha (CAMK2A) i                             | PMID:10766915  | J Physiol                                     | 2000 | 15     | 331          | 337        |
| CAPN1   | Regulation of CAPN1 activity has been correlated with varia                                 | PMID: 18423040 | BMC Genet.                                    | 2008 | 9      | 33           |            |
| CAPN10  | CAPN10 mRNA expression was studied in adipose tissue biopsies f                             | PMID: 15240652 | J Clin Endocrinol Metab.                      | 2004 | 89     | 3601         | 3605       |
| CAPN2   | wo genes of calpain (CAPN1 [macro-calpain] and CAPN2 [mili-calp                             | PMID: 18423040 | BMC Genet.                                    | 2008 | 9      | 33           |            |
| CAPNS1  | Proportion of the type 2a MHCs was determined for the                                       | PMID: 20563650 | Mol Biol Rep.                                 | 2010 |        |              |            |
| CARTPT  | Dephosphorylated Crtc1 stimulated expression of the Cartpt and                              | PMID: 18758446 | Nat Med.                                      | 2008 | 14     | 1112         | 1127       |
| CAST    | The association of the CAST SNP with carcass and meat quality tra                           | PMID: 16424255 | J Anim Sci.                                   | 2006 | 84     | 291          | 299        |
| CCND1   | Using real-time PCR in muscle biopsies taken earlier in the fattenir                        | PMID: 19296579 | J Agric Food Chem.                            | 2009 | 57     | 3808         | 3817       |
| CEBPA   | We observed higher CEBPA expression levels in subcutaneous fat,                             | PMID: 15340102 | Obes Res.                                     | 2004 | 12     | 1217         | 1222       |
| CEBPB   | We also selected genes of established and putative transcriptional                          | PMID: 19535224 | Nutrition.                                    | 2009 | 25     | 1047         | 1056       |
| COPB1   | The mapping results demonstrated that porcine LDHA and COPB1                                | PMID: 19830590 | Mol Biol Rep.                                 | 2010 | 37     | 629          | 636        |
| CP      | Given the occurrence of possible pancreatic or insulin response dy                          | PMID: 17659342 | Neurotoxicology.                              | 2007 | 28     | 899          | 914        |
| CREM    | Calcium/calmodulin-dependent protein kinase activity is regulatec                           | PMID: 17927910 | J Biochem Mol Biol.                           | 2007 | 40     | 757          | 764        |
| CRH     | The gene corticotropin releasing hormone (CRH) is mapped on bo                              | PMID:18059556  | Genome.                                       | 2007 | 50     | 936          | 345        |
| CS      | Accordingly, in addition to functional (ex-vivo fatty acid oxidatio                         | PMID: 20084391 | Eur J Appl Physiol.                           | 2010 | 109    | 307          | 316        |
| CSRP3   | We conclude,therefore, that there is a high recombination rate in                           | PMID: 19830590 | Mol Biol Rep.                                 | 2010 | 37     | 629          | 636        |
| CTST4   | It has been found that cystatin C secretion increased and cathepsin                         | PMID: 15985526 | FASEB J.                                      | 2005 | 19     | 1540         | 1542       |
| CTNNB1  | The extracellular protein dickkopf homolog 1 (DKK1) binds to a cel                          | PMID: 19776209 | Endocr Rev.                                   | 2009 | 30     | 624          | 712        |
| CTSB    | The gene loci DEFB1 (6.7 Mb)-CTSB (11.7 Mb), CTSB (11.7 Mb)?F                               | PMID: 15475247 | Genomics.                                     | 2004 | 84     | 696          | 706        |
| DECR1   | Two genes located on BTA14, 2,4 dienoyl CoA reductase 1 (DECR1                              | PMID:19395506  | J Anim Sci.                                   | 2009 | 87     | 2475         | 2484       |
| DES     | BLAST searches revealed that expression of the MDH, P14-K, ferriti                          | PMID:17927910  | J Biochem Mol Biol.                           | 2007 | 40     | 757          | 764        |
| DGAT1   | Previous studies have indicated that single nucleotide polymorphi                           | PMID:20416823  | Meat Sci.                                     | 2010 | 85     | 515          | 518        |
| ELOVL2  | The positions of other genes related to cholesterol metabolism (A                           | PMID: 20416790 | Meat Sci.                                     | 2010 | 85     | 721          | 729        |
| FABP3   | The FABP3 is involved in fatty acid transport from cell membrane                            | PMID: 18304447 | BMB Rep.                                      | 2008 | 41     | 29           | 34         |
| FABP4   | Previous studies have indicated that single nucleotide polymorphi                           | PMID:20416823  | Meat Sci.                                     | 2010 | 85     | 515          | 518        |
| FABP5   | Recently, FABP4 and FABP5 were proposed as potential candidate                              | PMID: 16879357 | Anim Genet.                                   | 2006 | 37     | 400          | 402        |
| FABP6   | In our study, the expression levels of FABP4 and FABP6 were high                            | PMID: 19232135 | BMC Genomics.                                 | 2009 | 10     | 87           |            |
| FABP7   | Two potential positional candidate genes present within the one L                           | PMID: 20390338 | Biochem Genet.                                | 2010 | 48     | 538          | 547        |
| FABP9   | Nine FABPs (FABP1 ? FABP9), expressed in normal liver, intestine,                           | PMID: 18826602 | BMC Cancer.                                   | 2008 | 8      | 276          |            |
| FAS     | Significant (P < .05) evidence for QTL was seen on chromosome 7                             | PMID: 9814894  | J Anim Sci.                                   | 1998 | 76     | 2560         | 2567       |
| FASN    | We found that the fasting-induced reduction in the expression of                            | PMID: 18974273 | Endocrinology.                                | 2009 | 150    | 1225         | 1234       |
| FGF8    | A gene on BTA26, fibroblast growth factor 8 (FGF8), has in recent                           | PMID:19395506  | J Anim Sci.                                   | 2009 | 87     | 2475         | 2484       |
| GCG     | A rise in serum glucagon, which would augment cAMP production                               | PMID: 18683021 | Amino Acids.                                  | 2009 | 37     | 169          | 175        |
| GH1     | Growth hormone (GH) is a major participant in the control of several physiological pro      |                | American Society of Animal Science            | 2004 | 55     |              |            |
| GHR     | GHR polymorphism was influential on moisture and intra-muscula                              | -              | Meat Sci.                                     | 2010 | 86     | 270          | 275        |
| GHRH    | The effect of leptin in adult rats appears to be exerted at hypothal                        | -              | Int J Obes                                    | 2000 | 24     | s100         | s103       |
| GHRL    | GHRL-1 and GHRL-2 were mainly expressed in the stomach, but w                               | PMID: 19073185 | Gen Comp Endocrinol.                          | 2009 | 160    | 223          | 235        |
| GNRH1   | Testes function, feedlot performance, and carcass traits were eval                          | PMID: 8426725  | J Anim Sci.                                   | 1996 | 74     | 950          | 954        |
| GPD1    | The three genes for which the expression pattern most strongly re                           | PMID: 19587329 | Biol Reprod.                                  | 2009 | 81     | 1083         | 1092       |
| GPD2    | Those associated with the PPARalpha/RXRalpha activation pathwa                              | PMID: 19393040 | Genome Biol.                                  | 2009 | 10     | R43          |            |
| H6PD    | Later an increased H6PD expression was reported during adipocyt                             | PMID: 18586838 | J Mol Endocrinol.                             | 2008 | 41     | 123          | 33         |
| HP      | [SAA] and [haptoglobin] were most strongly associated with liver                            | PMID: 20391639 | J Vet Intern Med.                             | 2010 | 24     | 213          | 219        |
| IGF1    | Adipocyte differentiation may be induced by both IGF-1 and insuli                           | PMID: 18849378 | J Anim Sci.                                   | 2009 | 87     | 1218         | 1246       |
| IGF2    | However, there have been QTL identified on BTA 29 close to IGF2                             | PMID:17785604  | J Anim Sci                                    | 2008 | 86     | 1            | 16         |
| INS     | These data indicate that i.m. and s.c. adipose tissues exhibit aspec                        | PMID:2005009   | J Anim Sci.                                   | 1991 | 69     | 162          | 170        |
| LDHA    | Porcine LDHA was highly expressed in lung, kidney, skeletal musck                           | PMID: 19830590 | Mol Biol Rep.                                 | 2010 | 37     | 629          | 636        |
| LEP     | Leptin and G6PDH are related to the expression of marbling what                             | PMID:17591707  | J Anim Sci.                                   | 2007 | 85     | 2882         | 2894       |
| LINGO4  | Ten SNPs were genotyped in RORC and the adjacent gene leucine-                              | PMID: 17151246 | Genetics                                      | 2007 | 175    | 843          | 853        |
| LIPE    | Hormone-sensitive lipase was firstly identified as an epinephrine-i                         | PMID: 18755148 | Biochem Biophys Res Commun.                   | 2008 | 376    | 36           | 39         |
| LPL     | Two experiments were conducted to determine the effects of anal                             | PMID:17235028  | J Anim Sci.                                   | 2007 | 85     | 430          | 440        |
| MAPK14  | Interestingly, this porcine SSC7 QTL region (9, 10) contains genes                          | PMID: 17426114 | Physiol Genomics.                             | 2007 | 30     | 232          | 241        |
| MB      | Lipid oxidation occurred throughout EO steaks, but metmyoglobin                             | PMID: 8454531  | J Anim Sci.                                   | 1993 | 71     | 105          | 118        |
| MC4R    | Many mutations in the MC4R gene are associated with obesity, en                             | PMID:19714485  | Mol Biol Rep.                                 | 2010 | 37     | 535          | 540        |
| MSTN    | Myostatin (as well knows as MSTN, GDF8. growth differentiation f                            | -              | Journal of Agrobiology,                       | 2008 | 25     | 81           | 83         |
| MYF5    | There is a report when PPAR $\gamma$ expressed in the myoblast cell line, i                 | -              | Plains Nutrition Council Spring               | 2007 |        | 9            | 25         |
| MYF6    | Meat production capacity in mammals is related to the numbers o                             | -              | Livestock Science                             | 2009 | 126    | 292          | 297        |
| MYH2    | MYBPC2 also clusters with other key components of the fast-twtic                            | PMID:16985009  | Physiol Genomics                              | 2006 | 13     | 76           | 83         |
| MYH4    | Myosin heavy chain 2B (Myh4) and phosphoglycerate mutase mus                                | PMID:17373633  | Horm Metab Res.                               | 2007 | 39     | 192          | 196        |
| Myhc    | Some previous studies have described a correlation between myo-                             | -              | J Agric Food Chem.                            | 2009 | 57     | 10898        | 10903      |
| MYL1    | Significant reduction in the mRNA levels of muscle contractile                              | 338            | -                                             | 2010 | 30     | 1182         | 1198       |
| Mylic2b | Myosin regulatory light chain (MLC) regulates myofilament activat                           | PMID:16802157  | Mol Genet Genomics.                           | 2006 | 276    | 264          | 272        |
| MYLK    | Myosin regulatory light chain (MLC) regulates myofilament activat                           | PMID:16802157  | Mol Genet Genomics.                           | 2006 | 276    | 264          | 272        |
| MyIpf   | The list includes many skeletal and cardiac sarcomeric proteins su                          | PMID:14688207  | FASEB J.                                      | 2004 | 18     | 403          | 405        |
| MYOD1   | The LDHA (lactate dehydrogenase A) and COPB1 (coatomer protei                               | PMID:19830590  | Mol Biol Rep.                                 | 2010 | 37     | 629          | 636        |
| MYOG    | Meat production capacity in mammals is related to the numbers of myofibers in muscl         |                | Livestock Science                             | 2009 | 126    | 292          | 297        |
| NCOA6   | The amplified in breast cancer-3 (AIB3, ASC-2, RAP250, PRIP, TRBF                           | PMID: 12368298 | J Biol Chem.                                  | 2002 | 277    | 45356        | 45360      |
| ND2     | As shown Figure 2, the expression of ND2 (P < 0.01) and COX3 (P <                           | PMID: 19874021 | J Agric Food Chem.                            | 2009 | 57     | 10898        | 10903      |
| NEB     | In addition, Titin and Nebulin were highly expressed in the low ma                          | PMID:19123974  | BMB Rep.                                      | 2008 | 41     | 846          | 851        |
| NHLH2   | In mice, targeted deletion of the neuronal transcription factor Nhl                         | PMID:16886999  | Anim Genet.                                   | 2006 | 37     | 24           | 27         |
| NPY     | Three SNP in the NPY gene showed the associations to marbling (F                            | PMID:17785604  | J Anim Sci                                    | 2008 | 86     | 1            | 16         |
| Nq1     | Loci including statistically significant and suggestive linkages for                        | PMID: 10101257 | Biochim Biophys Acta.                         | 1999 | 1453   | 385          | 395        |
| NR1H2   | The nuclear receptors liver X receptor $\alpha$ (LXR $\alpha$ ) (NR1H3) and LXR $\beta$     | PMID: 11504730 | J Biol Chem.                                  | 2001 | 276    | 38378        | 38387      |
| NR1H3   | The nuclear receptors liver X receptor $\alpha$ (LXR $\alpha$ ) (NR1H3) and LXR $\beta$     | PMID: 11504730 | J Biol Chem.                                  | 2001 | 276    | 38378        | 38387      |
| PLIN    | These results suggest that genetic variation in PLIN may affect gluc                        | PMID: 19782423 | Diabetes Res Clin Pract.                      | 2009 | 86     | 186          | 192        |
| PMP2    | Peripheral myelin protein 2 (PMP2) is a small, basic, and cytoplasm                         | PMID:8288226   | Genomics.                                     | 1993 | 18     | 244          | 248        |
| POMC    | This revealed that mRNAs for melanocortin 1 receptor (MC1R), M                              | -              | Poultry Science                               | 2010 | 47     | 176          | 182        |
| POU1F1  | Other carcass traits, including weight at slaughter, carcass weight, carcass yield ratio, e |                | Genes & Genomics                              | 2010 | 32     | 105          | 109        |
| PPARG   | In the analysis of variance, gene expression of five candidate gene                         | PMID:19123974  | BMB Rep.                                      | 2008 | 41     | 846          | 851        |
| PRL     | PRL strongly stimulated lipid mobilization in parr; this effect was                         | PMID: 3557090  | Gen Comp Endocrinol.                          | 1986 | 64     | 220          | 238        |
| PRNP    | Romanov PRNP haplotypes were associated with rump width (P =                                | PMID: 16543554 | J Anim Sci.                                   | 2006 | 84     | 783          | 788        |
| PROP1   | several studies reported that $\beta$ -catenin regulates transcriptional e                  | PMID:17251296  | J Biol Chem                                   | 2007 | 282    | 14515        | 14524      |
| PTH     | The present investigation in experimental animals was designed to                           | PMID: 7169982  | Miner Electrolyte Metab.                      | 1982 | 7      | 157          | 165        |
| RARA    | First, RA interferes with the transcriptional activity of C/EBP proteins, so that it blocks |                | Asian-australasian journal of animal sciences |      |        |              |            |
| RORC    | Variation at the retinoic acid receptor-related orphan receptor C                           | (PMID:19820062 | J Anim Sci.                                   | 2010 | 88     | 47           | 51         |
| RPL27A  | Thus, the ribosomal protein L27a (RPL27A) gene containing the c2                            | PMID:20163651  | J Anim Sci.                                   | 2009 | 80     | 631          | 635        |
| RUNX1   | Two genes located on BTA14, 2,4 dienoyl CoA reductase 1 (DECR1                              | PMID:19395506  | J Anim Sci.                                   | 2009 | 87     | 2475         | 2484       |
| RUNX1T1 | Two genes located on BTA14, 2,4 dienoyl CoA reductase 1 (DECR1                              | PMID:19395506  | J Anim Sci.                                   | 2009 | 87     | 2475         | 2484       |
| RXRA    | Second, RA strongly upregulates RAR $\beta$ expression in 3T3-L1 preadi                     | PMID: 12943220 | Cell Mol Life Sci.                            | 2003 | 60     | 1311         | 1321       |
| S1PR1   | The endothelial differentiation, sphingolipid G-protein-coupled re                          | PMID: 20163651 | Anim Sci J                                    | 2009 | 80     | 631          | 635        |
| SCD     | In the analysis of variance, gene expression of five candidate gene                         | PMID:19123974  | BMB Rep.                                      | 2008 | 41     | 846          | 851        |
| SP1     | These results suggest that PPAR $\gamma$ activation represses the expressi                  | PMID: 16876120 | Biochem Biophys Res Commun                    | 2006 | 348    | 253          | 258        |
| Spe1-r  | We investigated the effects of the two SNPs (Kpn2 1 and Msp 1) in                           | -              | Asian-Aust. J. Anim. Sci.                     | 2006 | 19     | 1691         | 1695       |
| SST     | We confirmed the presence of QTL affecting marbling, ribeye mus                             | PMID: 17121600 | Anim Genet.                                   | 2006 | 37     | 554          | 562        |
| TCAP    | In this study, we examined the association between genetic polymorphisms of the titin       |                | Meat Sci.                                     | 2007 | 77     | 257          | 263        |
| TFAM    | Our results suggest for the first time that TFAM gene plays an imp                          | PMID:16005429  | Biochem Biophys Res Commun.                   | 2005 | 334    | 516          | 523        |
| TG      | Previous studies have indicated that single nucleotide polymorphi                           | PMID:20416823  | Meat Sci.                                     | 2010 | 85     | 515          | 518        |
| THRSP   | The messenger RNA expression of ADIPOQ, SCD, and THRSP was h                                | PMID:18820161  | J Anim Sci                                    | 2009 | 87     | 119          | 130        |
| TNF     | Significant (P < .05) evidence for QTL was seen on chromosome 7                             | PMID:9814894   | J Anim Sci                                    | 1998 | 76     | 2560         | 2567       |
| TNNI1   | A randomized complete block design experiment with 360 single-s                             | PMID:20145300  | J Appl Genet                                  | 2010 | 51     | 51           | 57         |
| TNNI2   | A randomized complete block design experiment with 360 single-s                             | PMID:20145300  | J Appl Genet                                  | 2010 | 51     | 51           | 57         |
| TNNI3   | A randomized complete block design experiment with 360 single-s                             | PMID:20145300  | J Appl Genet                                  | 2010 | 51     | 51           | 57         |
| TRH     | The results reported here show first, that pharmacological activati                         | PMID: 19900503 | Mol Cell Endocrinol                           | 2010 | 137    | 44           | 52         |
| TTN     | As well as EDG1, the titin (TTN) gene, involved in myofibrillogen                           | PMID:19419586  | BMC Res Notes                                 | 2009 | 2      | 78           |            |
| UCP2    | In the current study, SNP in the bovine neuropeptide Y (NPY), grov                          | PMID:17785604  | J Anim Sci                                    | 2008 | 86     | 1            | 16         |
| UCP3    | In the current study, SNP in the bovine neuropeptide Y (NPY), grov                          | PMID:17785604  | J Anim Sci                                    | 2008 | 86     | 1            | 16         |
| UTS2    | Among 12 phenotypes related to fat deposition and fatty acid con                            | PMID: 18463714 | Int J Biol Sci                                | 2008 | 4      | 96           | 102        |
| UTS2R   | Among 12 phenotypes related to fat deposition and fatty acid con                            | PMID: 18463714 | Int J Biol Sci                                | 2008 | 4      | 96           | 102        |
| VDR     | We have shown that the expression of retinoic acid receptor (RAR                            | PMID:8680478   | Int J Obes Relat Metab Disord.                | 1996 | 20     | 52           | 57         |
